# Supplementary material for: Regulatory sites for known and novel splicing in human basal ganglia are enriched for disease-relevant information
Source: bioRxiv or medRxiv preprint supplement (doi:10.1101/591156), 2019-03-28

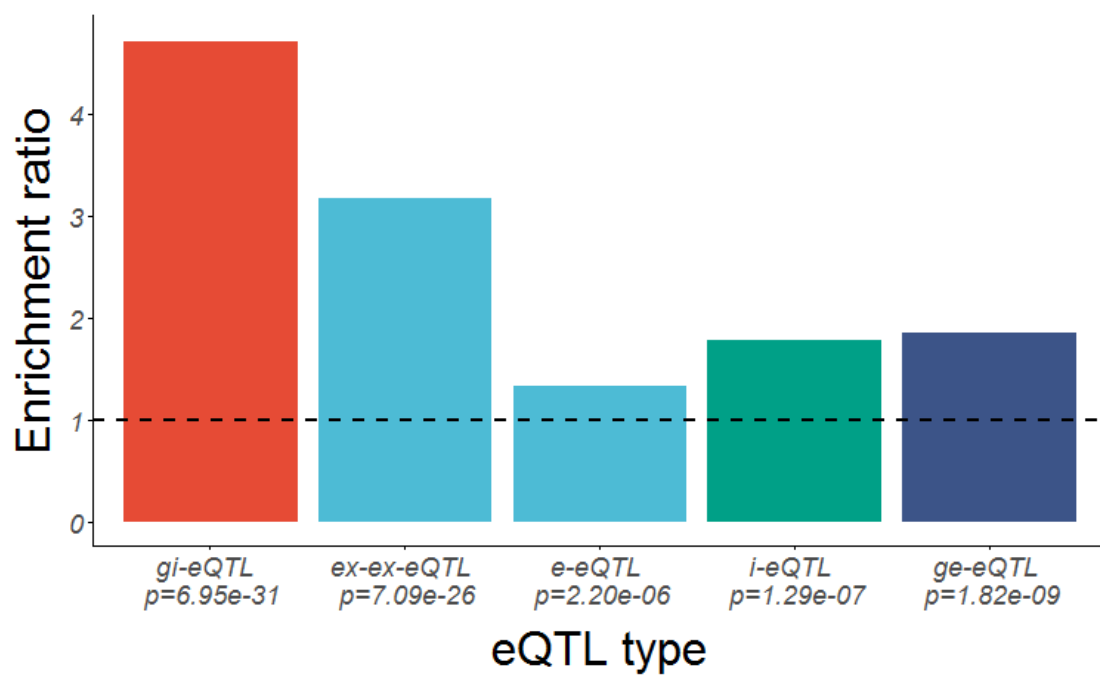

Supplement: Supplementary file [file media-3.pdf]
